# Supplementary material for: First characterisation of a CPD-class I photolyase from a UV-resistant extremophile isolated from High-Altitude Andean Lakes
Source: Royal Society of Chemistry journal article supplement (doi:10.1039/c3pp50399b), 2014-02-11
Supplement: c3pp50399b2.pdf [file c3pp50399b2.pdf]

| User mass | DB mass  | $\Delta$ mass (daltons) | peptide                  | position | modifications | missed cleavages |
|-----------|----------|-------------------------|--------------------------|----------|---------------|------------------|
| 1925.907  | 1925.947 | 0.039                   | (K)/YQWPVGESFALQMLEK/(F) | 201-216  |               | 0                |

**Matching peptides for specific cleavage:**

| User mass | DB mass   | $\Delta$ mass (daltons) | peptide                | position | modifications | missed cleavages |
|-----------|-----------|-------------------------|------------------------|----------|---------------|------------------|
| 1,526,505 | 1,526,837 | 0.331                   | (H)ILDFPRLSKYQ(P)      | 289-300  |               | 1                |
| 1,526,505 | 1,526,884 | 0.378                   | (K)PIVDLKMSRQRAL(A)    | 452-464  |               | 2                |
| 1,526,505 | 1,526,894 | 0.389                   | (P)NLKLNYPKPIVDL(K)    | 444-456  |               | 0                |
| 1,566,581 | 1,566,755 | 0.173                   | (D)ENLEPYKQQRDF(P)     | 220-231  |               | 1                |
| 1,566,581 | 1,566,806 | 0.225                   | (N)KTHQPYQVFGAYK/(R)   | 141-153  |               | 1                |
| 1,599,489 | 1,599,849 | 0.359                   | (F)ANKYQVTVIHANIE(I)   | 88-101   |               | 0                |
| 1,599,489 | 1,599,937 | 0.447                   | (E)LIQRFHTFKIPSI(H)    | 178-190  |               | 1                |
| 1,655,536 | 1,655,919 | 0.382                   | (L)KQFNIPLMVEIVPQ(W)   | 63-76    |               | 0                |
| 1,690,409 | 1,690,728 | 0.318                   | (L)IDGDLAANNGGWQWCA(S) | 376-391  |               | 0                |
| 1,690,409 | 1,690,849 | 0.440                   | (G)WMHNRVRMIVAMF(L)    | 343-355  |               | 1                |
| 1,722,683 | 1,722,885 | 0.201                   | (D)AQVKYQWPVGESFAL(Q)  | 197-211  |               | 0                |

**Matching peptides for unspecific cleavage:**

| User mass | DB mass | $\Delta$ mass<br>(daltons) | peptide | position | modifications | missed<br>cleavages |
|-----------|---------|----------------------------|---------|----------|---------------|---------------------|
|-----------|---------|----------------------------|---------|----------|---------------|---------------------|

**Matching peptides for  
unspecific cleavage:**

|           |           |        |                         |         |  |   |
|-----------|-----------|--------|-------------------------|---------|--|---|
| 1,722,683 | 1,722,907 | 0.224  | (N)KTHQPYQVFGAYKR/(A)   | 141-154 |  | 2 |
| 1,722,683 | 1,722,917 | 0.234  | (H)LDAKIIHEPYAKNPN(L)   | 430-444 |  | 1 |
| 1,722,683 | 1,722,917 | 0.234  | (L)DAKIIHEPYAKNPNL(K)   | 431-445 |  | 1 |
| 1,768,729 | 1,768,859 | 0.129  | (K)/THQPYQVFGAYKRAC(Y)  | 142-156 |  | 1 |
| 1,768,729 | 1,768,913 | 0.183  | (S)QKFDSQGNVIRKWWV(P)   | 411-424 |  | 2 |
| 1,768,729 | 1,769,003 | 0.273  | (E)LKQFNIPLMVEIVPQ(W)   | 62-76   |  | 0 |
| 1,812,023 | 1,811,911 | -0.111 | (R)/EFYQHILFDFPRLS(K)   | 284-297 |  | 0 |
| 1,812,023 | 1,811,944 | -0.079 | (D)FPRLSKYQPFNLNTS(N)   | 293-307 |  | 1 |
| 1,850,311 | 1,849,933 | -0.377 | (D)FPNIDATSQLSPYLNLG(I) | 231-247 |  | 0 |
| 1,850,311 | 1,849,942 | -0.369 | (N)LLIDWRKGEQWFMQ(H)    | 360-373 |  | 1 |
| 1,850,311 | 1,849,981 | -0.330 | (W)DDVPARLLTFANKYQV(T)  | 78-93   |  | 1 |

| User mass | DB mass | $\Delta$ mass<br>(daltons) | peptide | position | modifications | missed<br>cleavages |
|-----------|---------|----------------------------|---------|----------|---------------|---------------------|
|-----------|---------|----------------------------|---------|----------|---------------|---------------------|

**Matching peptides for  
unspecific cleavage:**

|           |           |        |                          |         |  |   |
|-----------|-----------|--------|--------------------------|---------|--|---|
| 1,850,311 | 1,849,999 | -0.311 | (A)MFLSKNLLIDWRKGE(Q)    | 354-368 |  | 2 |
| 1,850,311 | 1,850,007 | -0.303 | (Q)PHELIQRFHTFKIPS(I)    | 175-189 |  | 1 |
| 1,893,488 | 1,893,049 | -0.438 | (K)/VQPHELIQRFHTFKI(P)   | 173-187 |  | 1 |
| 1,893,488 | 1,893,096 | -0.392 | (S)VPQPLAVPKVQPHELIQ(R)  | 164-180 |  | 0 |
| 1,968,243 | 1,968,013 | -0.230 | (W)REFYQHILFDFPRLS(K)    | 283-297 |  | 1 |
| 1,990,409 | 1,990,003 | -0.406 | (L)LESHKVTVEYYHDRTI(F)   | 117-132 |  | 1 |
| 1,990,409 | 1,990,003 | -0.406 | (Q)TLLESHKVTVEYYHDR/(T)  | 115-130 |  | 1 |
| 1,990,409 | 1,990,003 | -0.406 | (T)LESHKVTVEYYHDRT(I)    | 116-131 |  | 1 |
| 1,990,409 | 1,990,102 | -0.306 | (K)/VQPHELIQRFHTFKIP(S)  | 173-188 |  | 1 |
| 2,025,698 | 2,025,924 | 0.225  | (F)MQHLIDGDLAANNGGWQW(C) | 372-389 |  | 0 |
| 2,025,698 | 2,025,962 | 0.264  | (F)NLNTSNVPWRDAPDELNA(W) | 303-320 |  | 0 |

| User mass | DB mass   | $\Delta$ mass<br>(daltons) | peptide                       | position | modifications |
|-----------|-----------|----------------------------|-------------------------------|----------|---------------|
| 2,025,698 | 2,026,025 | 0.326                      | (R)/QDLRVRDNTALMEATR(H)       | 8-24     | 2             |
| 2,025,698 | 2,026,050 | 0.352                      | (F)DSQGNIRKWWPELAHL(D)        | 414-430  | 1             |
| 2,025,698 | 2,026,050 | 0.352                      | (D)SQGNIRKWWPELAHLD(A)        | 415-431  | 1             |
| 2,087,768 | 2,087,993 | 0.225                      | (V)PWRDAPDELNAWKFGQTG(I)      | 310-327  | 1             |
| 2,087,768 | 2,088,062 | 0.293                      | (Q)TGPIVDAGIRQMLETGWM(H)      | 326-344  | 0             |
| 2,087,768 | 2,088,106 | 0.337                      | (N)AWKFGQTGPIVDAGIRQM(L)      | 320-338  | 1             |
| 2,108,572 | 2,108,092 | -0.479                     | (S)QKFDSQGNIRKWWPEL(A)        | 411-427  | 2             |
| 2,147,514 | 2,147,044 | -0.469                     | (S)PEQWKLHDDAEIKIDFY(L)       | 35-51    | 1             |
| 2,147,514 | 2,147,067 | -0.447                     | (S)KYQPFNLNTSNVPWRDAP(D)      | 298-315  | 1             |
| 2,147,514 | 2,147,070 | -0.443                     | (R)/HGNTCAVVILSPEQWKLHD(D)    | 24-42    | 0             |
| 2,147,514 | 2,147,154 | -0.359                     | (N)LIWFRQDLRVRDNTALM(E)       | 3-19     | 2             |
| 2,147,514 | 2,148,001 | 0.486                      | (G)WQWCASTGTDVVPYFRIF(N)      | 387-404  | 0             |
| 2,172,094 | 2,172,065 | -0.029                     | (V)RDNTALMEATRHGNTCAVVI(L)    | 13-32    | 1             |
| 2,172,094 | 2,172,083 | -0.010                     | (K)YQWPVGESFALQMLEK(F)        | 201-218  | 0             |
| 2,172,094 | 2,172,192 | 0.098                      | (L)AHLDAKIIHEPYAKNP(L)        | 428-446  | 2             |
| 2,172,094 | 2,172,221 | 0.126                      | (S)QLSPYLNLGIVSIRQCLAAI(F)    | 239-258  | 0             |
| 2,172,094 | 2,172,229 | 0.134                      | (P)ARLLTFANKYQVTVIHANI(E)     | 82-100   | 1             |
| 2,214,483 | 2,214,115 | -0.367                     | (S)FALQMLEKFDENLEPYK/(Q)      | 209-226  | 1             |
| 2,214,483 | 2,214,128 | -0.355                     | (K)/NLLIDWRKGEQWFMQHL(I)      | 359-375  | 1             |
| 2,214,483 | 2,214,239 | -0.243                     | (A)HLDAKIIHEPYAKNP(L)         | 429-447  | 2             |
| 2,387,178 | 2,387,160 | -0.017                     | (L)LIDWRKGEQWFMQHLIDGD(L)     | 361-379  | 1             |
| 2,387,178 | 2,387,160 | -0.017                     | (L)IDWRKGEQWFMQHLIDGDL(A)     | 362-380  | 1             |
| 2,387,178 | 2,387,229 | 0.051                      | (W)REFYQHILFDFPRLSKYQ(P)      | 283-300  | 2             |
| 2,427,648 | 2,427,219 | -0.429                     | (R)/DAPDELNAWKFGQTGPIVDAGI(R) | 313-335  | 0             |
| 2,427,648 | 2,427,230 | -0.417                     | (C)ASTGTDVVPYFRIFNPISQSQK/(F) | 391-412  | 1             |
| 2,427,648 | 2,427,234 | -0.413                     | (D)LRVRDNTALMEATRHGNTCAVV(I)  | 10-31    | 2             |
| 2,427,648 | 2,427,234 | -0.413                     | (L)RVRDNTALMEATRHGNTCAVVI(L)  | 11-32    | 2             |
| 2,427,648 | 2,427,263 | -0.385                     | (E)IELKQFNIPLMVEIVPQWDD(V)    | 60-79    | 0             |
| 2,427,648 | 2,427,274 | -0.373                     | (P)LMVEIVPQWDDVPARLLTFAN(K)   | 69-89    | 0             |
| 2,477,148 | 2,477,141 | -0.007                     | (L)YSDGQQTWLDELLWREFYQ(H)     | 269-287  | 0             |
| 2,477,148 | 2,477,188 | 0.040                      | (S)DGQQTWLDELLWREFYQHI(L)     | 271-289  | 0             |

**Matching peptides for  
unspecific cleavage:**

**Matching peptides for unspecific cleavage:**

| User mass | DB mass   | $\Delta$ mass (daltons) | peptide                           | position | modifications | missed cleavages |
|-----------|-----------|-------------------------|-----------------------------------|----------|---------------|------------------|
| 2,477,148 | 2,477,319 | 0.170                   | (P)QWDDVPARLLTFANKYQVTVI(H)       | 76-96    |               | 1                |
| 2,638,363 | 2,638,497 | 0.133                   | (E)IKIDFYLRQLKSLEIELKQFN(I)       | 46-66    |               | 3                |
| 2,638,363 | 2,638,497 | 0.133                   | (I)KIDFYLRQLKSLEIELKQFNI(P)       | 47-67    |               | 3                |
| 2,775,702 | 2,775,353 | -0.349                  | (W)FRQDLRVRDNTALMEATR HGNTCA(V)   | 6-29     |               | 3                |
| 2,775,702 | 2,775,446 | -0.255                  | (P)EQWKLHDDAEIKIDFYLRQLKS(L)      | 36-57    |               | 3                |
| 2,775,702 | 2,775,556 | -0.146                  | (L)DAKIIHEPYAKNPNLKLNYPKPIV(D)    | 431-454  |               | 2                |
| 2,775,702 | 2,775,556 | -0.146                  | (D)AKIIHEPYAKNPNLKLNYPKPIVD(L)    | 432-455  |               | 2                |
| 2,826,595 | 2,826,374 | -0.221                  | (S)IRQCLAAIFSR SNGNFHLYSDGQQT(W)  | 251-275  |               | 1                |
| 2,826,595 | 2,826,421 | -0.174                  | (F)RQDLRVRDNTALMEATR HGNTCAVV(I)  | 7-31     |               | 3                |
| 2,881,893 | 2,881,419 | -0.474                  | (A)LQMLEKFVDENLEPYKQQRDFPN(I)     | 211-233  |               | 2                |
| 2,881,893 | 2,881,419 | -0.474                  | (L)QMLEKFVDENLEPYKQQRDFPNI(D)     | 212-234  |               | 2                |
| 2,881,893 | 2,881,463 | -0.429                  | (R)/IFNPISQSQKFDSQGN YIRKWWPE(L)  | 403-426  |               | 2                |
| 2,881,893 | 2,881,463 | -0.429                  | (I)FNPISQSQKFDSQGN YIRKWWPEL(A)   | 404-427  |               | 2                |
| 2,881,893 | 2,881,475 | -0.418                  | (Q)TGPIVDAGIRQMLETGWMHNRV RM(I)   | 326-350  |               | 2                |
| 2,881,893 | 2,881,478 | -0.415                  | (N)LGIVSIRQCLAAIFSR SNGNFHLYSD(G) | 246-271  |               | 1                |
| 2,881,893 | 2,881,495 | -0.397                  | (L)TFANKYQVTVIHANIEIGV NELHRD(A)  | 86-110   |               | 1                |
| 2,881,893 | 2,881,536 | -0.357                  | (I)VPQWDDVPARLLTFANKYQVTVIHA(N)   | 74-98    |               | 1                |
| 2,881,893 | 2,881,537 | -0.356                  | (V)RMIVAMFLSKNLLIDWRKGEQWF(M)     | 349-371  |               | 3                |
| 2,881,893 | 2,881,593 | -0.299                  | (D)DVPARLLTFANKYQVTVIHANIEIGV(N)  | 79-104   |               | 1                |
| 2,881,893 | 2,881,630 | -0.263                  | (C)YEILNISVPQPLAVPKVQPHELIQR/(F)  | 157-181  |               | 1                |
| 2,932,518 | 2,932,520 | 0.002                   | (Q)VQTLLESHKVTVEYYH DRTIFPLGS(I)  | 113-137  |               | 1                |
| 2,932,518 | 2,932,667 | 0.149                   | (Q)PLAVPKVQPHELIQR FHTFKIPSIH(D)  | 167-191  |               | 2                |

| User mass | DB mass | $\Delta$ mass<br>(daltons) | peptide | position | modifications | missed<br>cleavages |
|-----------|---------|----------------------------|---------|----------|---------------|---------------------|
|-----------|---------|----------------------------|---------|----------|---------------|---------------------|

Potentially modified peptides,  
detected by mass difference and  
conforming to rules (considering  
only peptide  
masses that have not matched  
above):

|          |          |        |                         |         |               |  |
|----------|----------|--------|-------------------------|---------|---------------|--|
| 2,537.90 | 1,941.94 | -0.343 | YQWPVGESFALQMLEK        | 201-216 | 1xTPO (THR)   |  |
| 2,710.54 | 2,695.25 | -0.281 | SNGNFHLYSDGQQTWLDPELLWR | 262-283 | 1xTPO (DEAME) |  |
