# Supplementary figures and images for: First characterisation of a CPD-class I photolyase from a UV-resistant extremophile isolated from High-Altitude Andean Lakes
Source: Royal Society of Chemistry journal article supplement (doi:10.1039/c3pp50399b), 2014-02-11

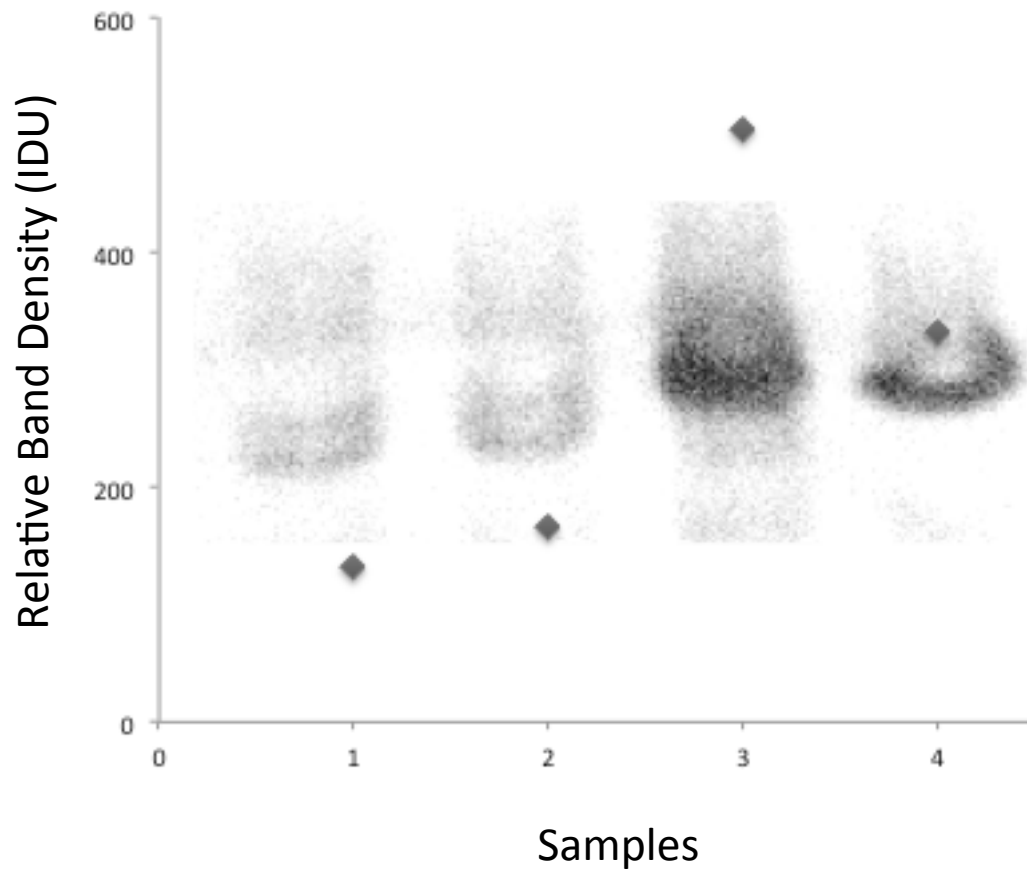

Supplement: c3pp50399b1.pdf [file c3pp50399b1.pdf]

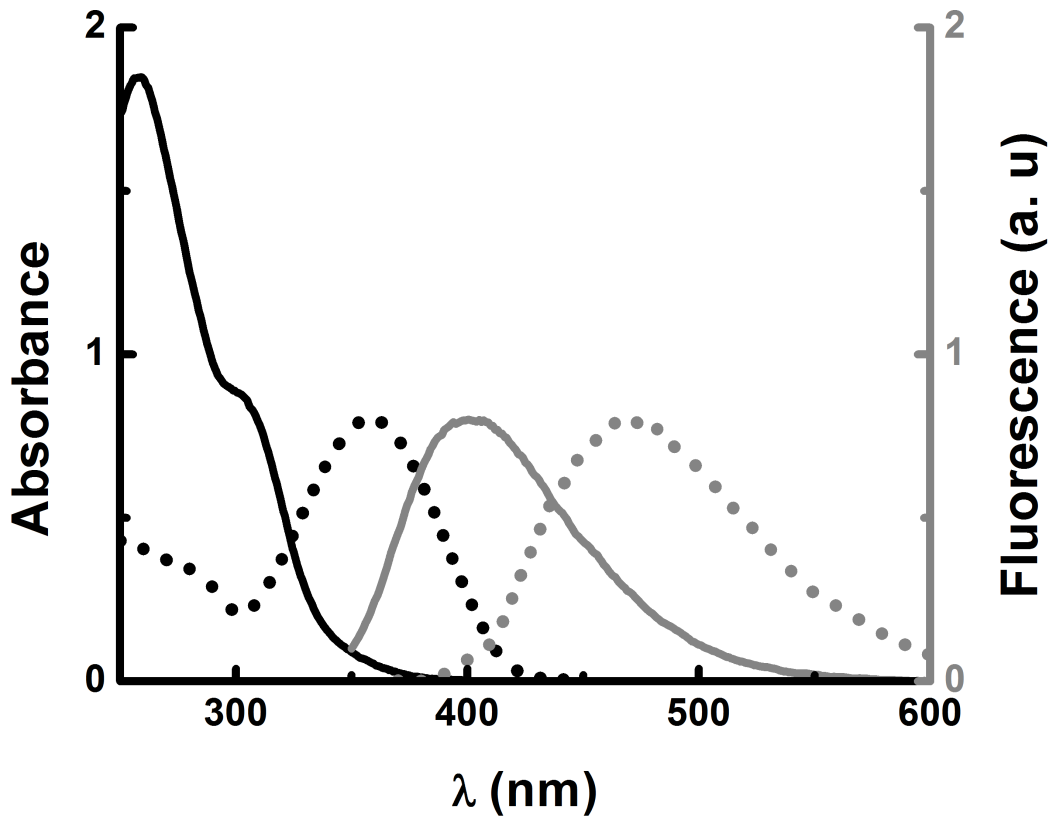

Supplement: c3pp50399b4.pdf [file c3pp50399b4.pdf]
